# Supplementary material for: Integrated 2D multi-fin field-effect transistors
Source: PubMed Central journal article supplement (PMC11058203; doi:10.1038/s41467-024-47974-2), 2024-04-29
Supplement: 41467_2024_47974_MOESM1_ESM.pdf [file 41467_2024_47974_MOESM1_ESM.pdf]

# Supplementary Information for

## **Integrated 2D multi-fin field-effect transistors**

Mengshi Yu<sup>†</sup>, Congwei Tan<sup>†</sup>, Yuling Yin<sup>†</sup>, Junchuan Tang, Xiaoyin Gao, Hongtao Liu,  
Feng Ding\*, Hailin Peng\*

Corresponding to: [hlpeng@pku.edu.cn](mailto:hlpeng@pku.edu.cn); [f.ding@siat.ac.cn](mailto:f.ding@siat.ac.cn)

## Supplementary Figures

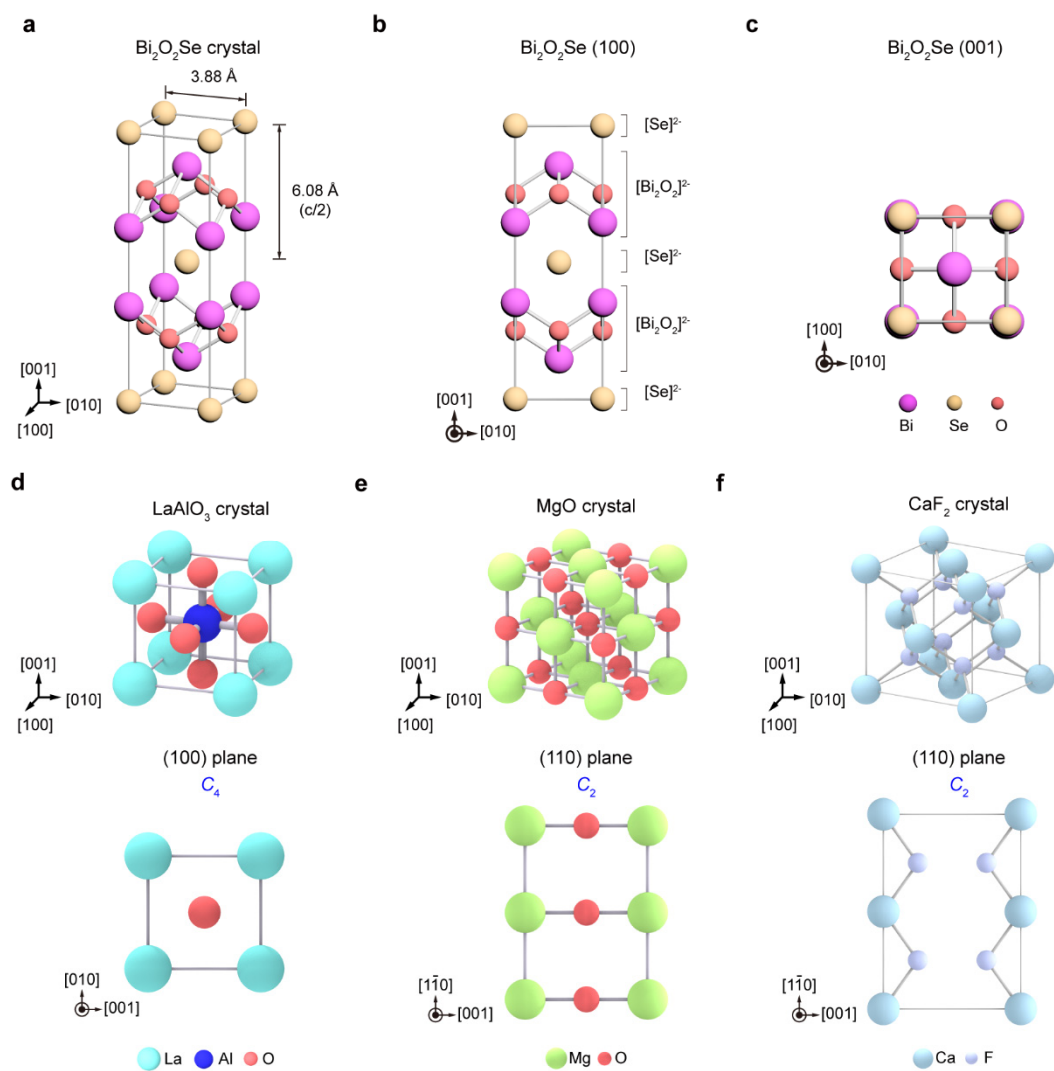

**Supplementary Fig. 1. Schematics of crystal structure of 2D  $\text{Bi}_2\text{O}_2\text{Se}$  semiconductor and insulating substrates. a,** 3D crystal structure of  $\text{Bi}_2\text{O}_2\text{Se}$ . **b,** Lateral view of  $\text{Bi}_2\text{O}_2\text{Se}$  crystal structure. **c,** top view of  $\text{Bi}_2\text{O}_2\text{Se}$  crystal structure. **d,** 3D structure and (100) facet lattice of  $\text{LaAlO}_3$  crystal. **e,** 3D structure and (110) facet lattice of  $\text{MgO}$  crystal. **f,** 3D structure and (110) facet lattice of  $\text{CaF}_2$  crystal.

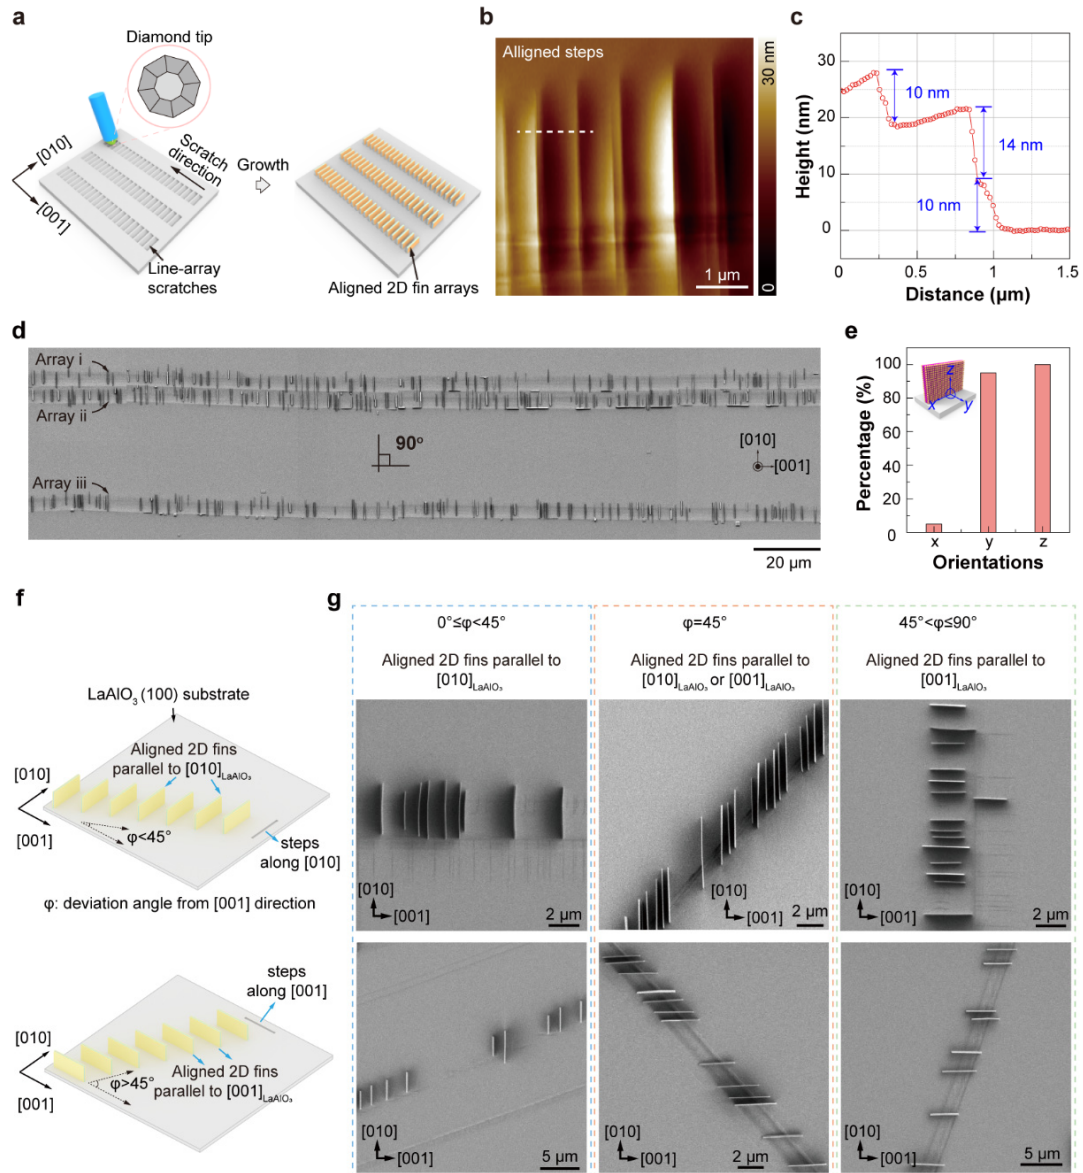

**Supplementary Fig. 2. Creating process of artificially parallel steps using a diamond scraper.** **a**, Schematic illustration of creating line-array scratches by diamond scraper. **b**, **c**, AFM image (**b**) and corresponding step height (**c**) of the artificial steps. **d**, SEM image of guided-grown 2D fin arrays while using a micromachined arm and a diamond scrape to control the step spacing. **e**, Statistical orientations of the 2D fin arrays in (**d**). **f**, Schematic illustration of different step orientations under different scratch directions. **g**, SEM images of 2D fin arrays with varying orientations resulting from scratches in different directions.

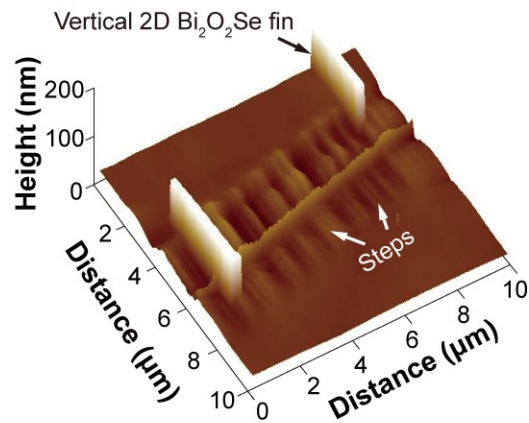

**Supplementary Fig. 3. AFM image of 2D fins nucleating the step edges.**

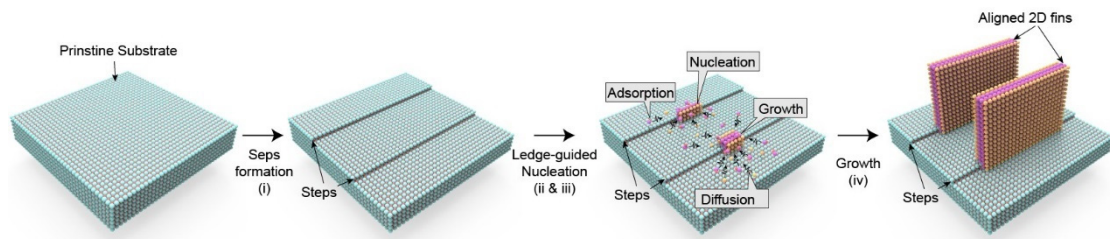

**Supplementary Fig. 4. Schematic of ledge-guided epitaxy process, including steps formation, ledge-guided nucleation and growth.**

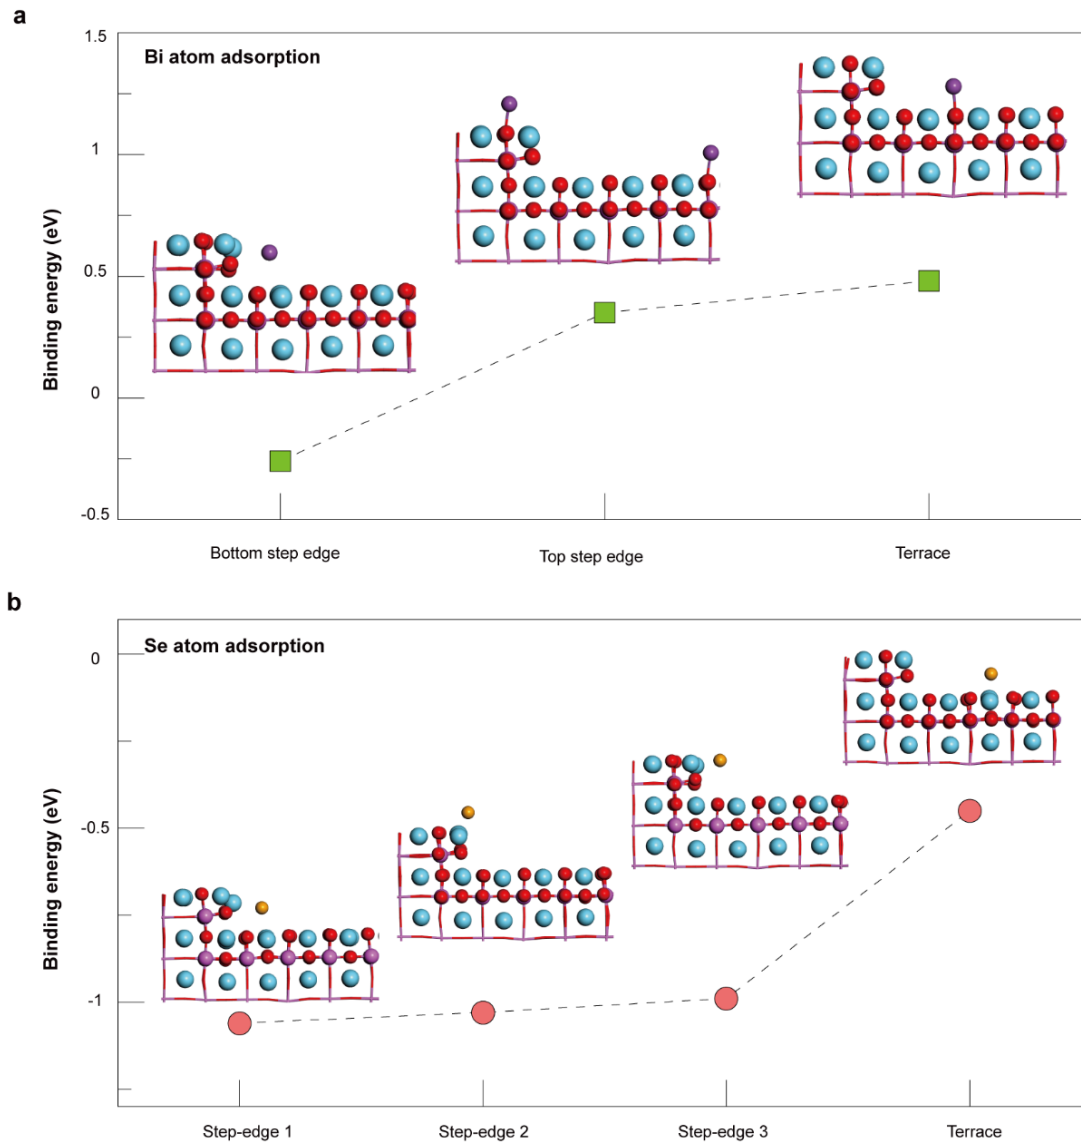

**Supplementary Fig. 5. The configurations of Bi atom (a) and Se atom (b) adsorbed on the LaAlO<sub>3</sub> substrate with different sites and corresponding binding energies.**

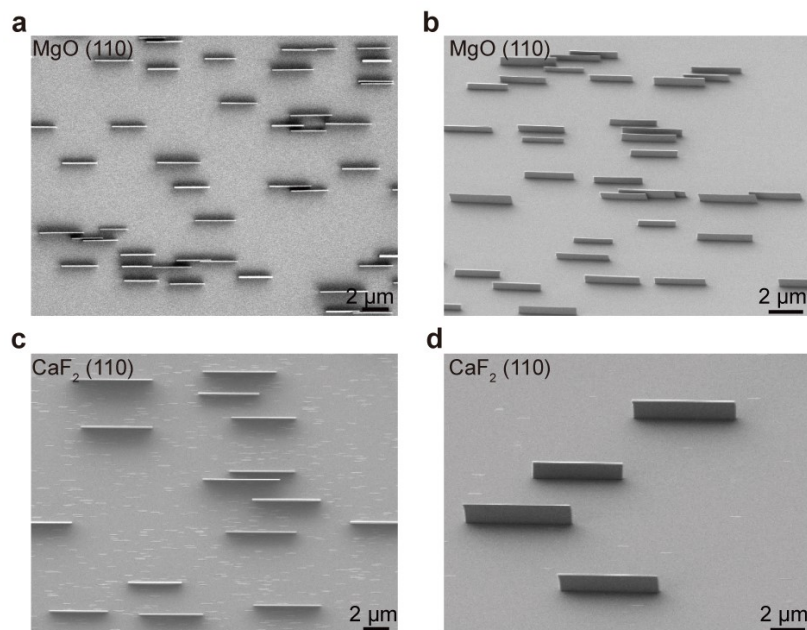

**Supplementary Fig. 6. Morphology of 2D fins grown on pristine insulating substrates without steps. a, b,** Top-view (a) and tilted-view (b) SEM images of 2D Bi<sub>2</sub>O<sub>2</sub>Se fins on MgO (110). **c, d,** Top-view (c) and tilted-view (d) SEM images of 2D Bi<sub>2</sub>O<sub>2</sub>Se fins on CaF<sub>2</sub> (110).



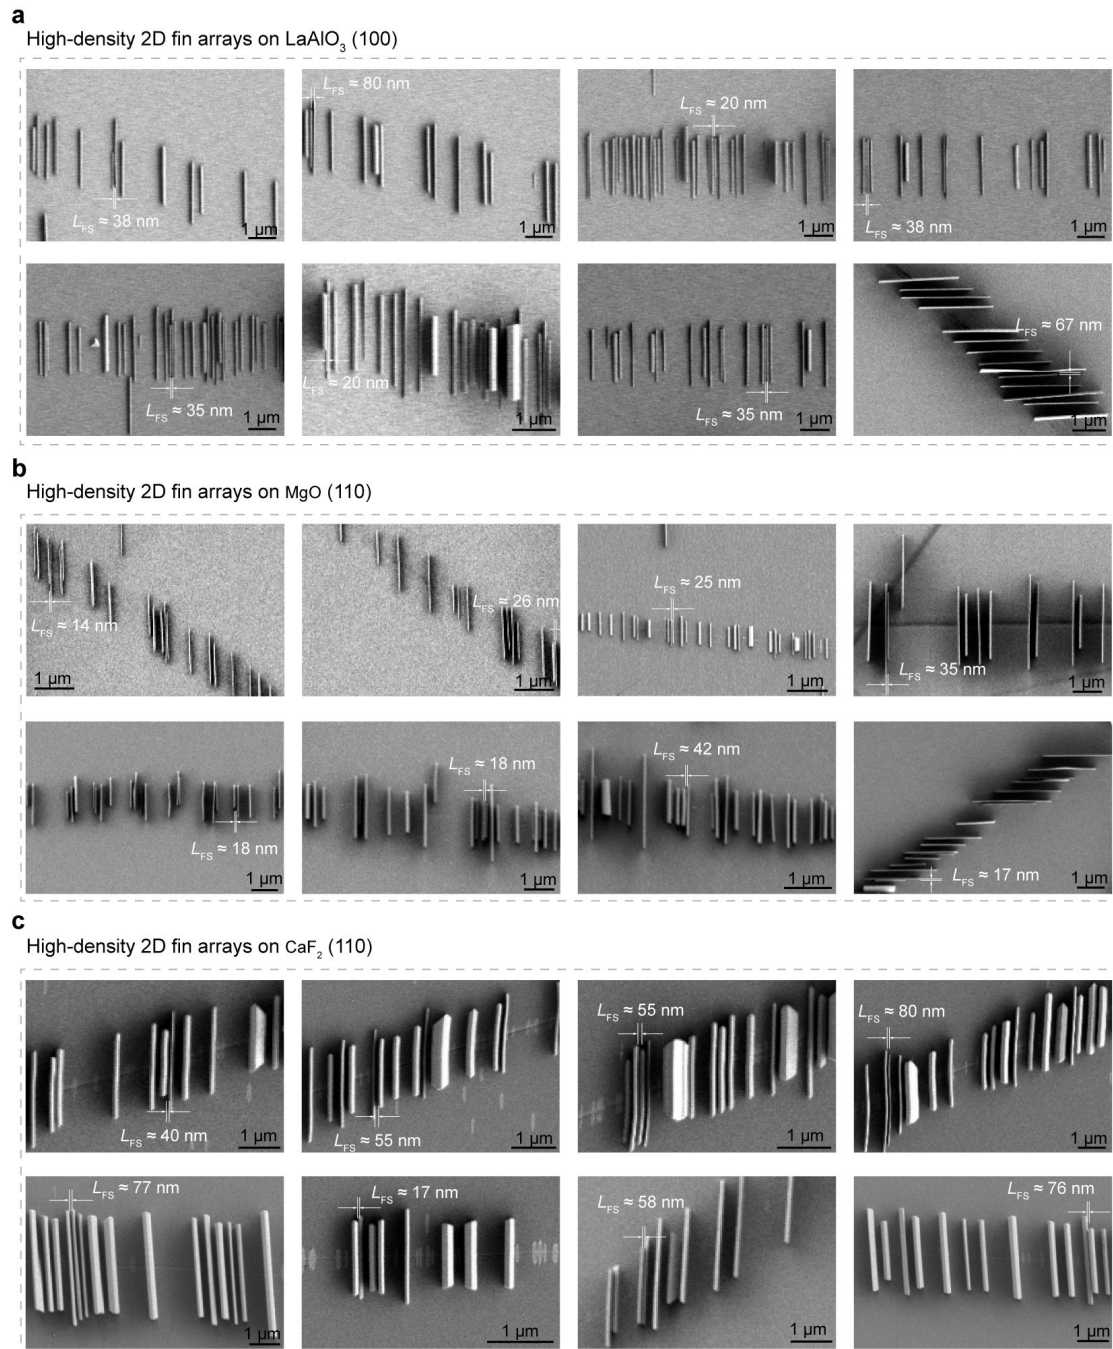

**Supplementary Fig. 7. High-density 2D fin arrays on  $\text{LaAlO}_3$  substrate (a),  $\text{MgO}$  substrate (b) and  $\text{CaF}_2$  substrate (c).**

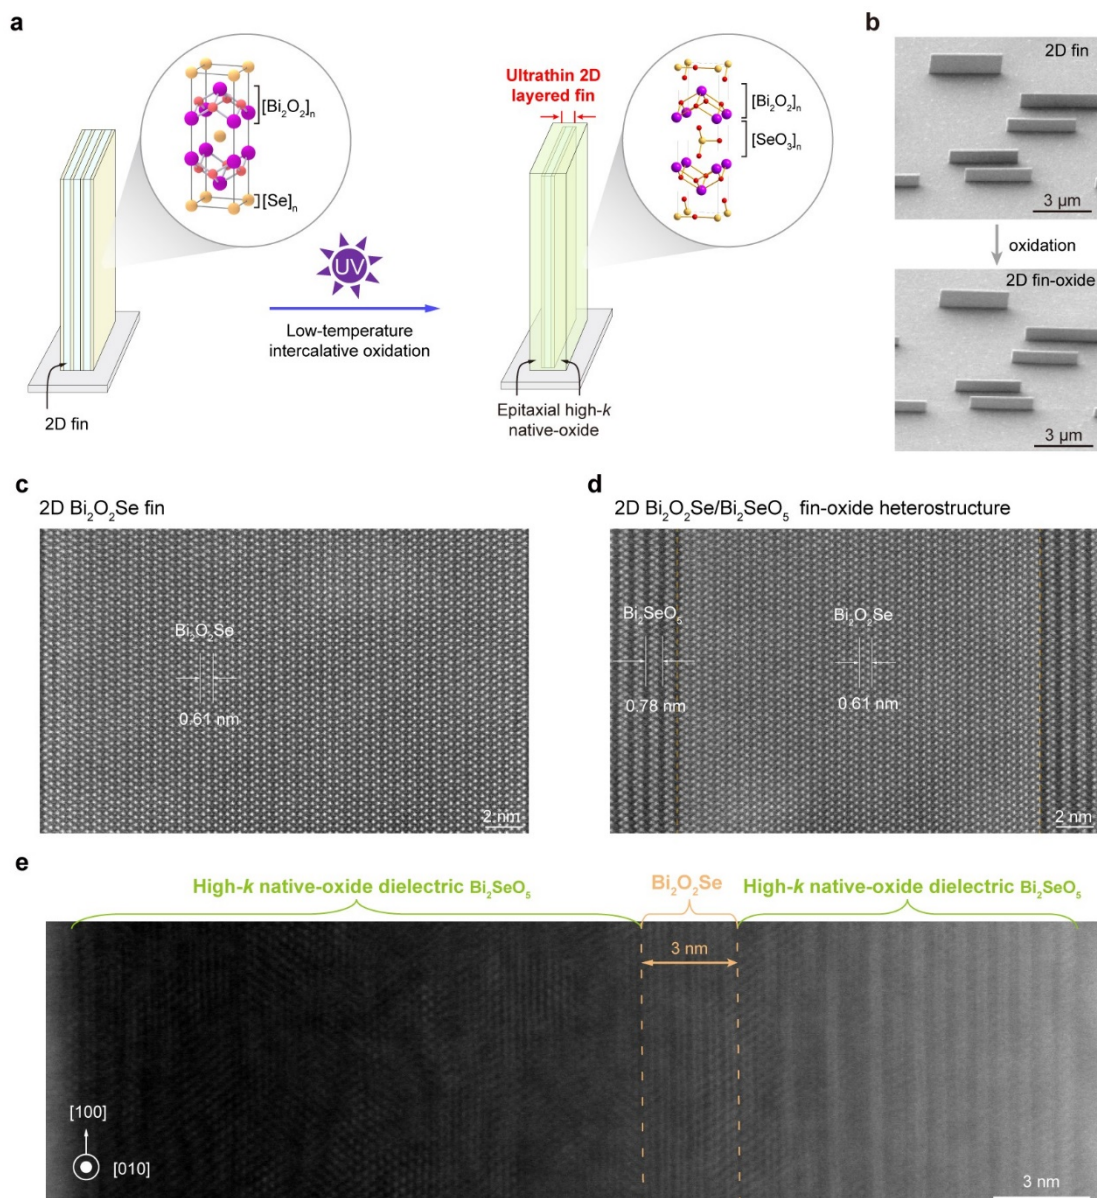

**Supplementary Fig. 8. Intercalative oxidation of  $\text{Bi}_2\text{O}_2\text{Se}$  fin and structural characterization of  $\text{Bi}_2\text{O}_2\text{Se}/\text{Bi}_2\text{SeO}_5$  fin-oxide heterostructures.** **a**, Schematic diagram of intercalative oxidation of  $\text{Bi}_2\text{O}_2\text{Se}$  fin to  $\text{Bi}_2\text{O}_2\text{Se}/\text{Bi}_2\text{SeO}_5$  fin-oxide heterostructure. **b**, Tilted-view SEM images of as-synthesized rectangular 2D  $\text{Bi}_2\text{O}_2\text{Se}$  fin arrays (top) and  $\text{Bi}_2\text{O}_2\text{Se}/\text{Bi}_2\text{SeO}_5$  fin-oxide heterostructure arrays after intercalative oxidation (down). **c**, **d**, Cross-sectional high-resolution STEM micrograph of 2D  $\text{Bi}_2\text{O}_2\text{Se}$  fin (**b**) and  $\text{Bi}_2\text{O}_2\text{Se}/\text{Bi}_2\text{SeO}_5$  fin-oxide heterostructure (**c**). **e**, Cross-sectional HR-STEM images of the 2D  $\text{Bi}_2\text{O}_2\text{Se}$  fin showing the ultrathin body of about 3 nm



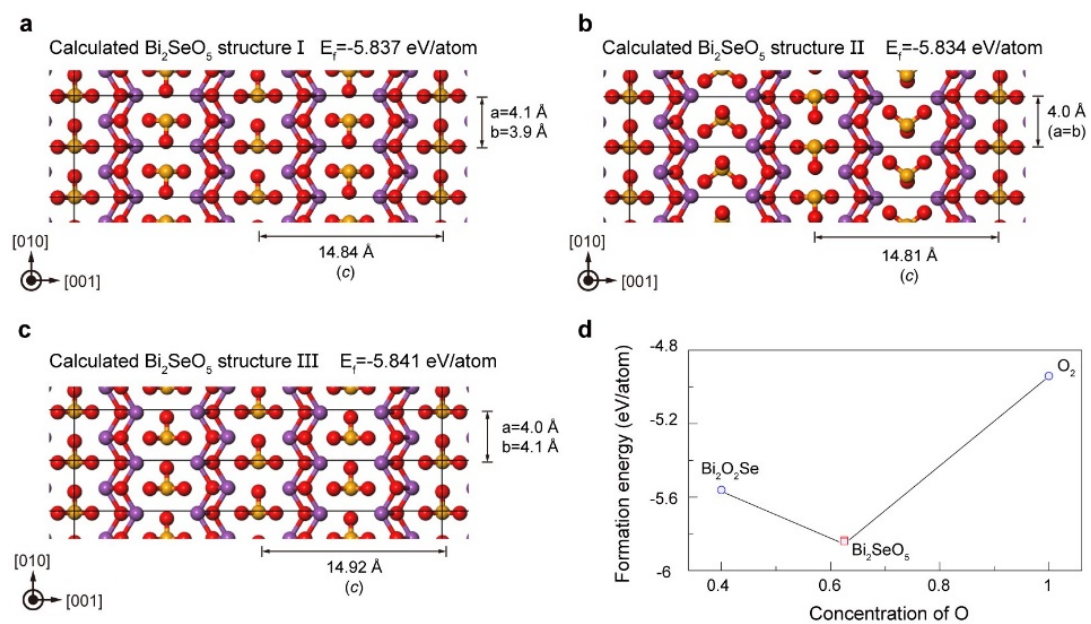

**Supplementary Fig. 9. DFT calculations of formation energies and stable structures of  $\text{Bi}_2\text{SeO}_5$ .** a-c, Stable crystal structures of  $\text{Bi}_2\text{SeO}_5$  calculated by DFT. d, The plot of comparison of the formation energies of  $\text{Bi}_2\text{O}_2\text{Se}$ ,  $\text{Bi}_2\text{SeO}_5$  and  $\text{O}_2$ .

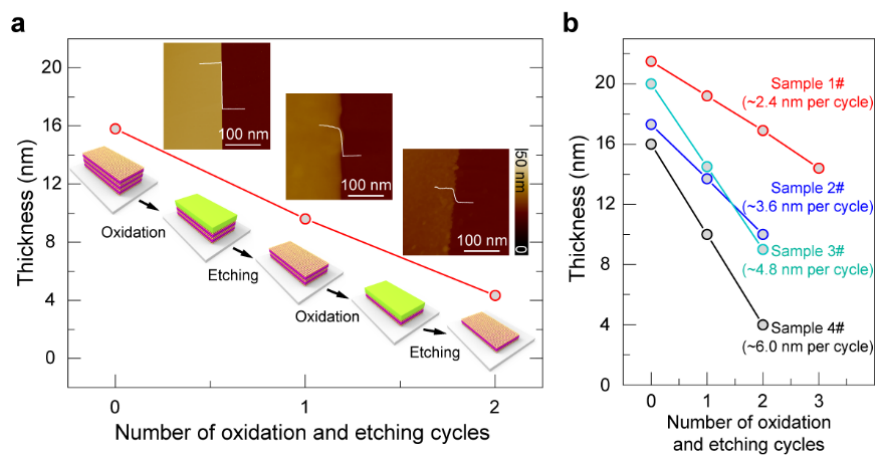

**Supplementary Fig. 10. Controllable thickness scaling of 2D fins.** To determine the surface roughness and thickness evolution by using AFM, the vertical fins were put down on the substrate. **a**, Thickness scaling of a  $\text{Bi}_2\text{O}_2\text{Se}$  fin in two oxidation-etching cycles. **b**, Thickness scaling of  $\text{Bi}_2\text{O}_2\text{Se}$  fins with different oxidation rate.

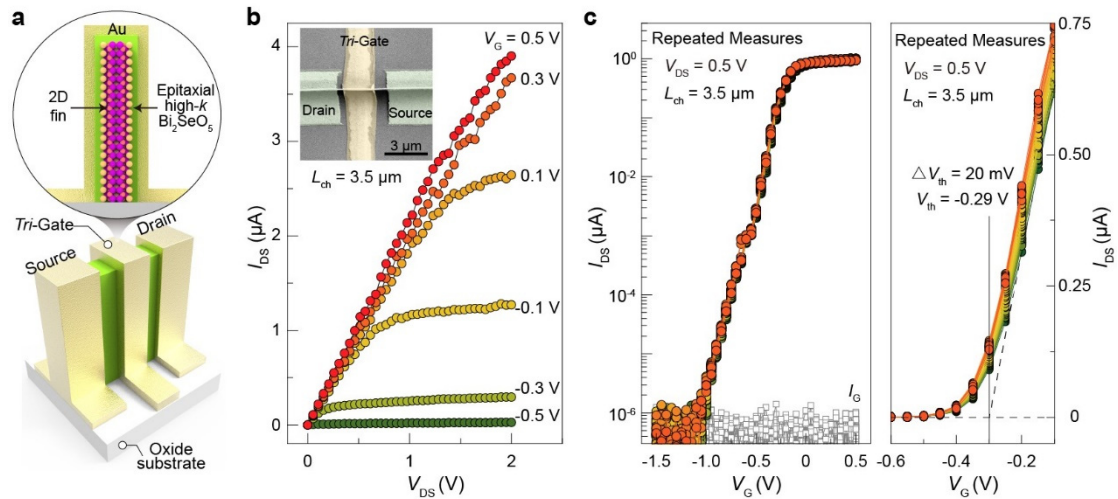

**Supplementary Fig. 11. Electrical performance of 2D Bi<sub>2</sub>O<sub>2</sub>Se/Bi<sub>2</sub>SeO<sub>5</sub> FinFET fabricated without using additional HfO<sub>2</sub> dielectric. a**, Schematic diagram of 2D FinFET fabricated with Bi<sub>2</sub>SeO<sub>5</sub> dielectric. **b**, **c**, Transfer (**b**) and output (**c**) curves measurement results for 50 cycles of a 2D Bi<sub>2</sub>O<sub>2</sub>Se/Bi<sub>2</sub>SeO<sub>5</sub> FinFET with a channel length ( $L_{ch}$ ) of 3.5  $\mu\text{m}$ . The inset in (**b**) shows the top-view SEM image of as-fabricated 2D FinFET.

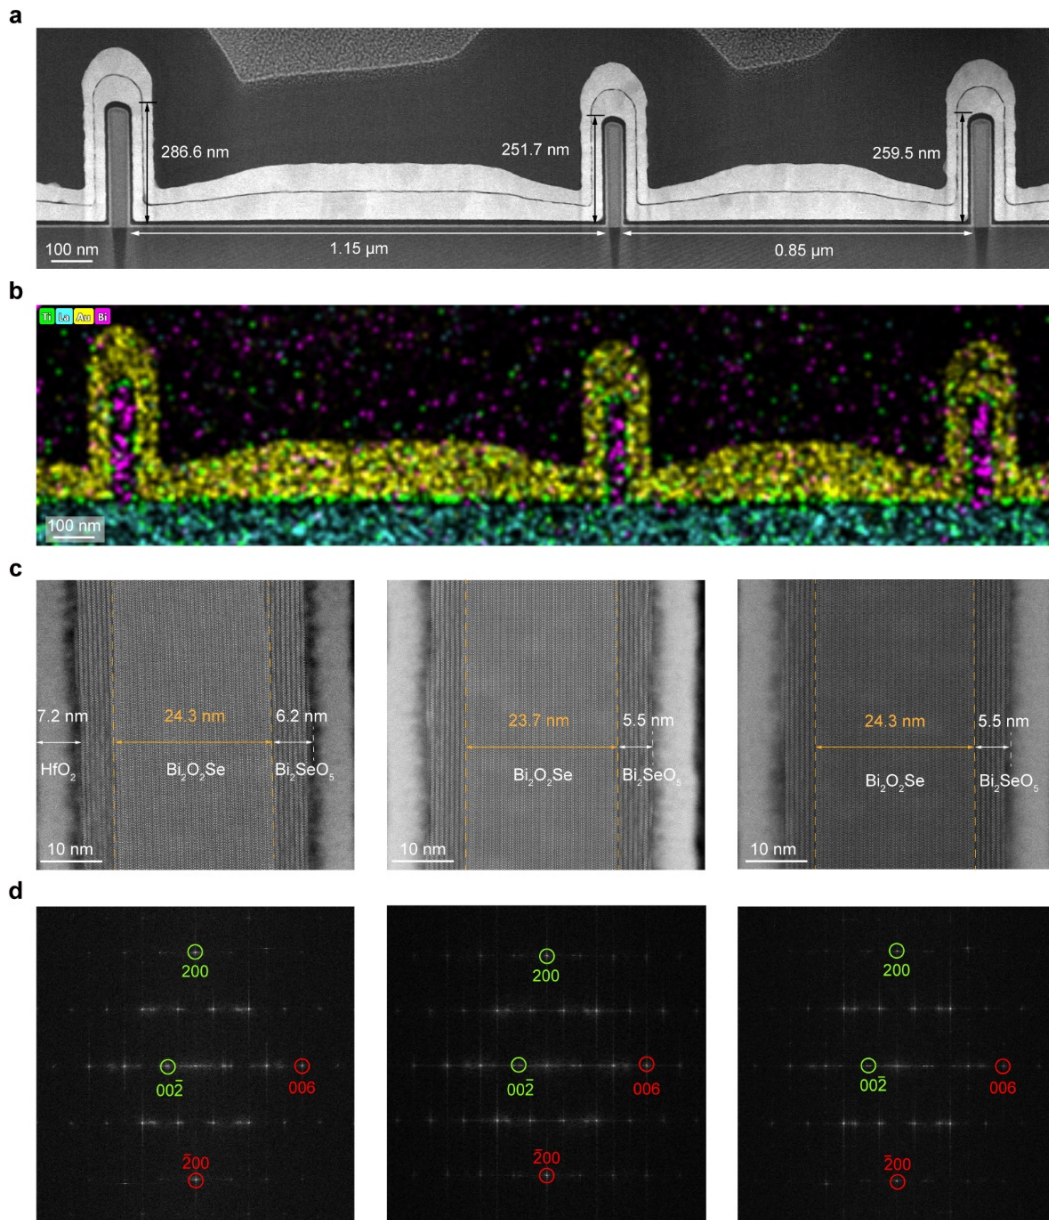

**Supplementary Fig. 12. Structure characterization of a multi-fin FET with 3 fins.** **a, b**, Cross-sectional STEM image of fin arrays (**a**) and the corresponding Energy-dispersive X-ray spectroscopy (EDS) image (**b**). **c**, The thickness measurement of different fin channels and dielectrics by high-resolution STEM images. **d**, The corresponding FFT diffraction spots of the interface in (**c**).

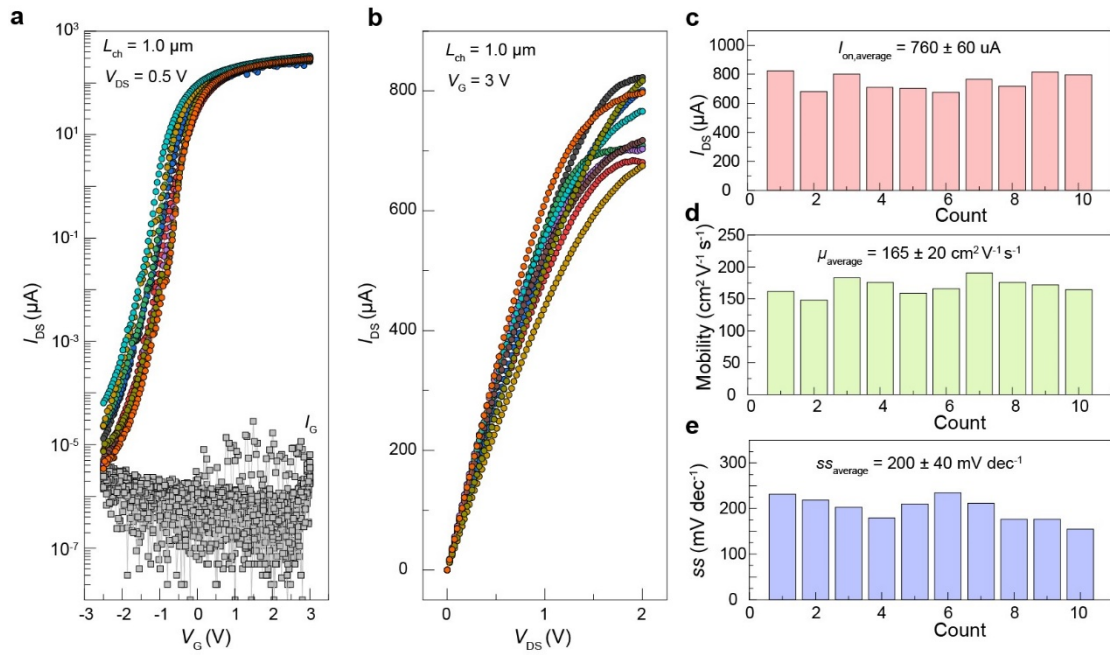

**Supplementary Fig. 13. Device-to-device variability. a, b,** Transfer (a) and output (b) characteristics of 10 2D multi-fin FETs (the fin number is 3). **c-e,** Statistical distributions of on-state current (c), mobility (d), and subthreshold swing (e) for 10 devices.



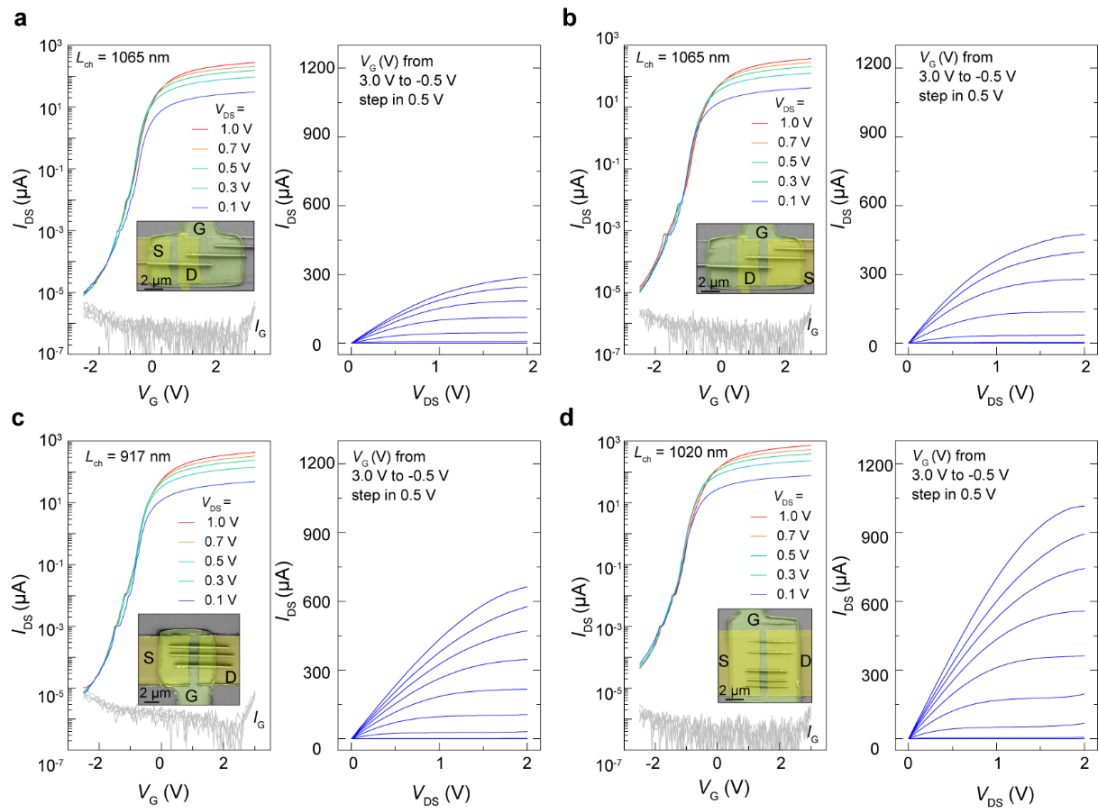

**Supplementary Fig. 14. Typical output curves and transfer curves demonstrating the performance of 2D FinFETs with 1 fin (a), 2 fins (b), 3 fins (c) and 5 fins (d), respectively.**

**Supplementary Table 1. On-state current ( $I_{ON}$ ) and transconductance ( $g_m$ ) of representative 2D Bi<sub>2</sub>O<sub>2</sub>Se/Bi<sub>2</sub>SeO<sub>5</sub>/HfO<sub>2</sub> FinFETs**

| <i>Device Num. (#)</i> | <i>Fin Num.</i> | $L_{Ch}/L_G^b$ (nm) | $g_m$ ( $\mu S$ )<br>(@ $V_{DS}=1$ V) | $I_{ON}$ ( $\mu A$ )<br>(@ $V_{DS}=1$ V) | $I_{ON, max}$ ( $\mu A$ )<br>(@ $V_{DS}=1$ V) | Gate delay<br>(ps) |
|------------------------|-----------------|---------------------|---------------------------------------|------------------------------------------|-----------------------------------------------|--------------------|
| 1                      | 1               | 1065                | 119                                   | 212                                      | 286                                           | 32.47044           |
| 2                      | 1               | 959                 | 88                                    | 200                                      | 232                                           | 30.99296           |
| 3                      | 1               | 984                 | 75                                    | 172                                      | 263                                           | 22.75557           |
| 4                      | 2               | 1065                | 157                                   | 364                                      | 474                                           | 37.82271           |
| 5                      | 2               | 822                 | 148                                   | 325                                      | 411                                           | 32.69587           |
| 6                      | 2               | 753                 | 157                                   | 300                                      | 419                                           | 26.20741           |
| 7                      | 2               | 984                 | 135                                   | 294                                      | 366                                           | 26.62557           |
| 8                      | 2               | 918                 | 149                                   | 312                                      | 545                                           | 30.72122           |
| 9                      | 2               | 780                 | 185                                   | 308                                      | 422                                           | 26.442             |
| 10                     | 2               | 1164                | 150                                   | 276                                      | 383                                           | 43.5104            |
| 11                     | 2               | 863                 | 155                                   | 348                                      | 463                                           | 25.89298           |
| 12                     | 2               | 959                 | 125                                   | 283                                      | 377                                           | 35.38202           |
| 13                     | 2               | 1137                | 124                                   | 221                                      | 369                                           | 53.71785           |
| 14                     | 3               | 925                 | 201                                   | 405                                      | 532                                           | 35.77078           |
| 15                     | 3               | 1096                | 231                                   | 560                                      | 823                                           | 37.95057           |
| 16                     | 3               | 1230                | 203                                   | 482                                      | 681                                           | 49.48275           |
| 17                     | 3               | 902                 | 212                                   | 343                                      | 648                                           | 44.45519           |
| 18                     | 3               | 1055                | 220                                   | 511                                      | 645                                           | 40.03384           |
| 19                     | 3               | 917                 | 210                                   | 463                                      | 487                                           | 41.05361           |
| 20                     | 2               | 1274                | 157                                   | 395                                      | 613                                           | 41.69431           |
| 21                     | 3               | 1322                | 177                                   | 438                                      | 663                                           | 36.01635           |
| 22                     | 5               | 1020                | 292                                   | 707                                      | 1020                                          | 28.69273           |
| 23                     | 2               | 1027                | 278                                   | 692                                      | 985                                           | 19.18531           |
